# Supplementary material for: Ferroelectricity in oxygen-deficient perovskite-type oxide Sr10Ga6Sc4O25
Source: Royal Society of Chemistry journal article supplement (doi:10.1039/d2tc05118d), 2023-01-01
Supplement: d2tc05118d1.pdf [file d2tc05118d1.pdf]

Supplementary Information for  
**Ferroelectricity in Oxygen-Deficient Perovskite-type  $\text{Sr}_{10}\text{Ga}_6\text{Sc}_4\text{O}_{25}$**

Akitoshi Nakano\*, Ichiro Terasaki, and Hiroki Taniguchi  
*Department of Physics, Nagoya University, Nagoya 464-8602, Japan*

Contents

- A. Sample dependence of the dielectric permittivity

### A. Sample dependence of the dielectric permittivity

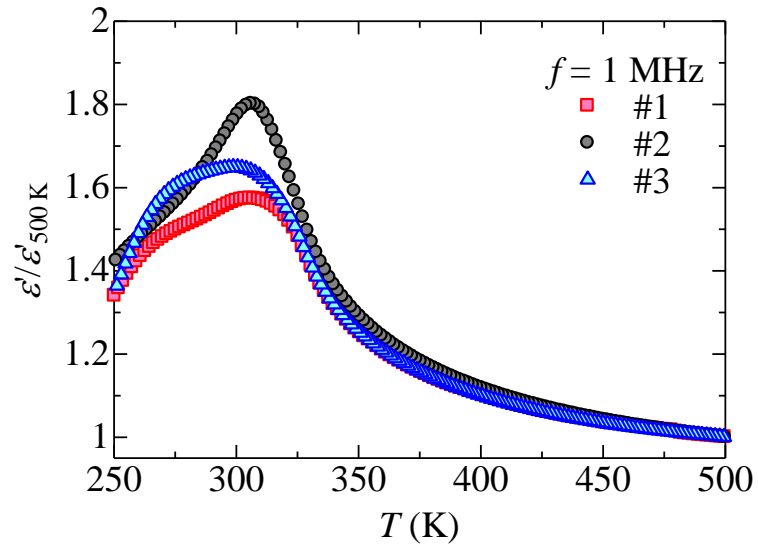

Figure S1 Sample dependence of the real part ( $\epsilon'$ ) of the dielectric permittivity. Sample #1 and #2 are from same batch, and Sample #3 is from another batch. Sample #2 is also shown in the main text. The ratio between main peak around 310 K and subpeak around 270 K strongly depends on the test pellet even when the samples come from the same batch.
